# Supplementary material for: Impact of family medicine clerkships in undergraduate medical education: a systematic review
Source: HighWire-hosted journal article supplement (doi:10.1136/bmjopen-2015-008265), 2015-08-01
Supplement: bmjopen-2015-008265supp.pdf [file bmjopen-2015-008265supp.pdf]

## **APPENDIX : DATABASE SEARCHING SYNTAXES**

### **1. MEDLINE (via OVID)**

(using free entry terms)

general practice/general practitioner\*/family medicine/family practitioner\*/family practice/primary health care/primary care physician\*/family physician\*

AND

clerkship\*/clinical clerkship\*/ preceptor\*/attachment\*/clinical attachment\*/rotation\*/clinical rotation\*/placement\*/clinical placement\*

**826 titles**

### **2. Embase**

(using Emtree terms)

general practice/family medicine/general practitioner/primary medical care/primary health care/

AND

clinical education/clinical supervision

AND

medical student/medical school/undergraduate student

**350 titles**

### **3. ERIC**

family medicine/general practi\*/family practi\*//primary health care/primary care physician/family physician

AND

clinical clerkship/clerkship/clinical attachment/attachment/clinical rotation/rotation/clinical placement/placement/preceptor\*

**137 titles**

#### **4. Web Of Science/Knowledge**

general practi\*/family practi\*/family medicine/family physician/primary health care/primary care  
physician

AND

clinical clerkship\*/clinical attachment\*/clinical rotation\*/clinical placement\*/preceptorship\*

**200 titles**

#### **5. PsycINFO**

exp family medicine /family medicine mp/exp family physicians /family physician mp/ exp primary  
health care/primary health care mp./exp general practitioner/general practitoner mp./primary care  
physician mp./

AND

clerkship\*.mp/preceptor\*.mp

**142 titles**
